# Supplementary material for: Changes of intestinal bacterial microbiota in coronary heart disease complicated with nonalcoholic fatty liver disease
Source: PubMed Central journal article supplement (PMC6857132; doi:10.1186/s12864-019-6251-7), 2019-11-14

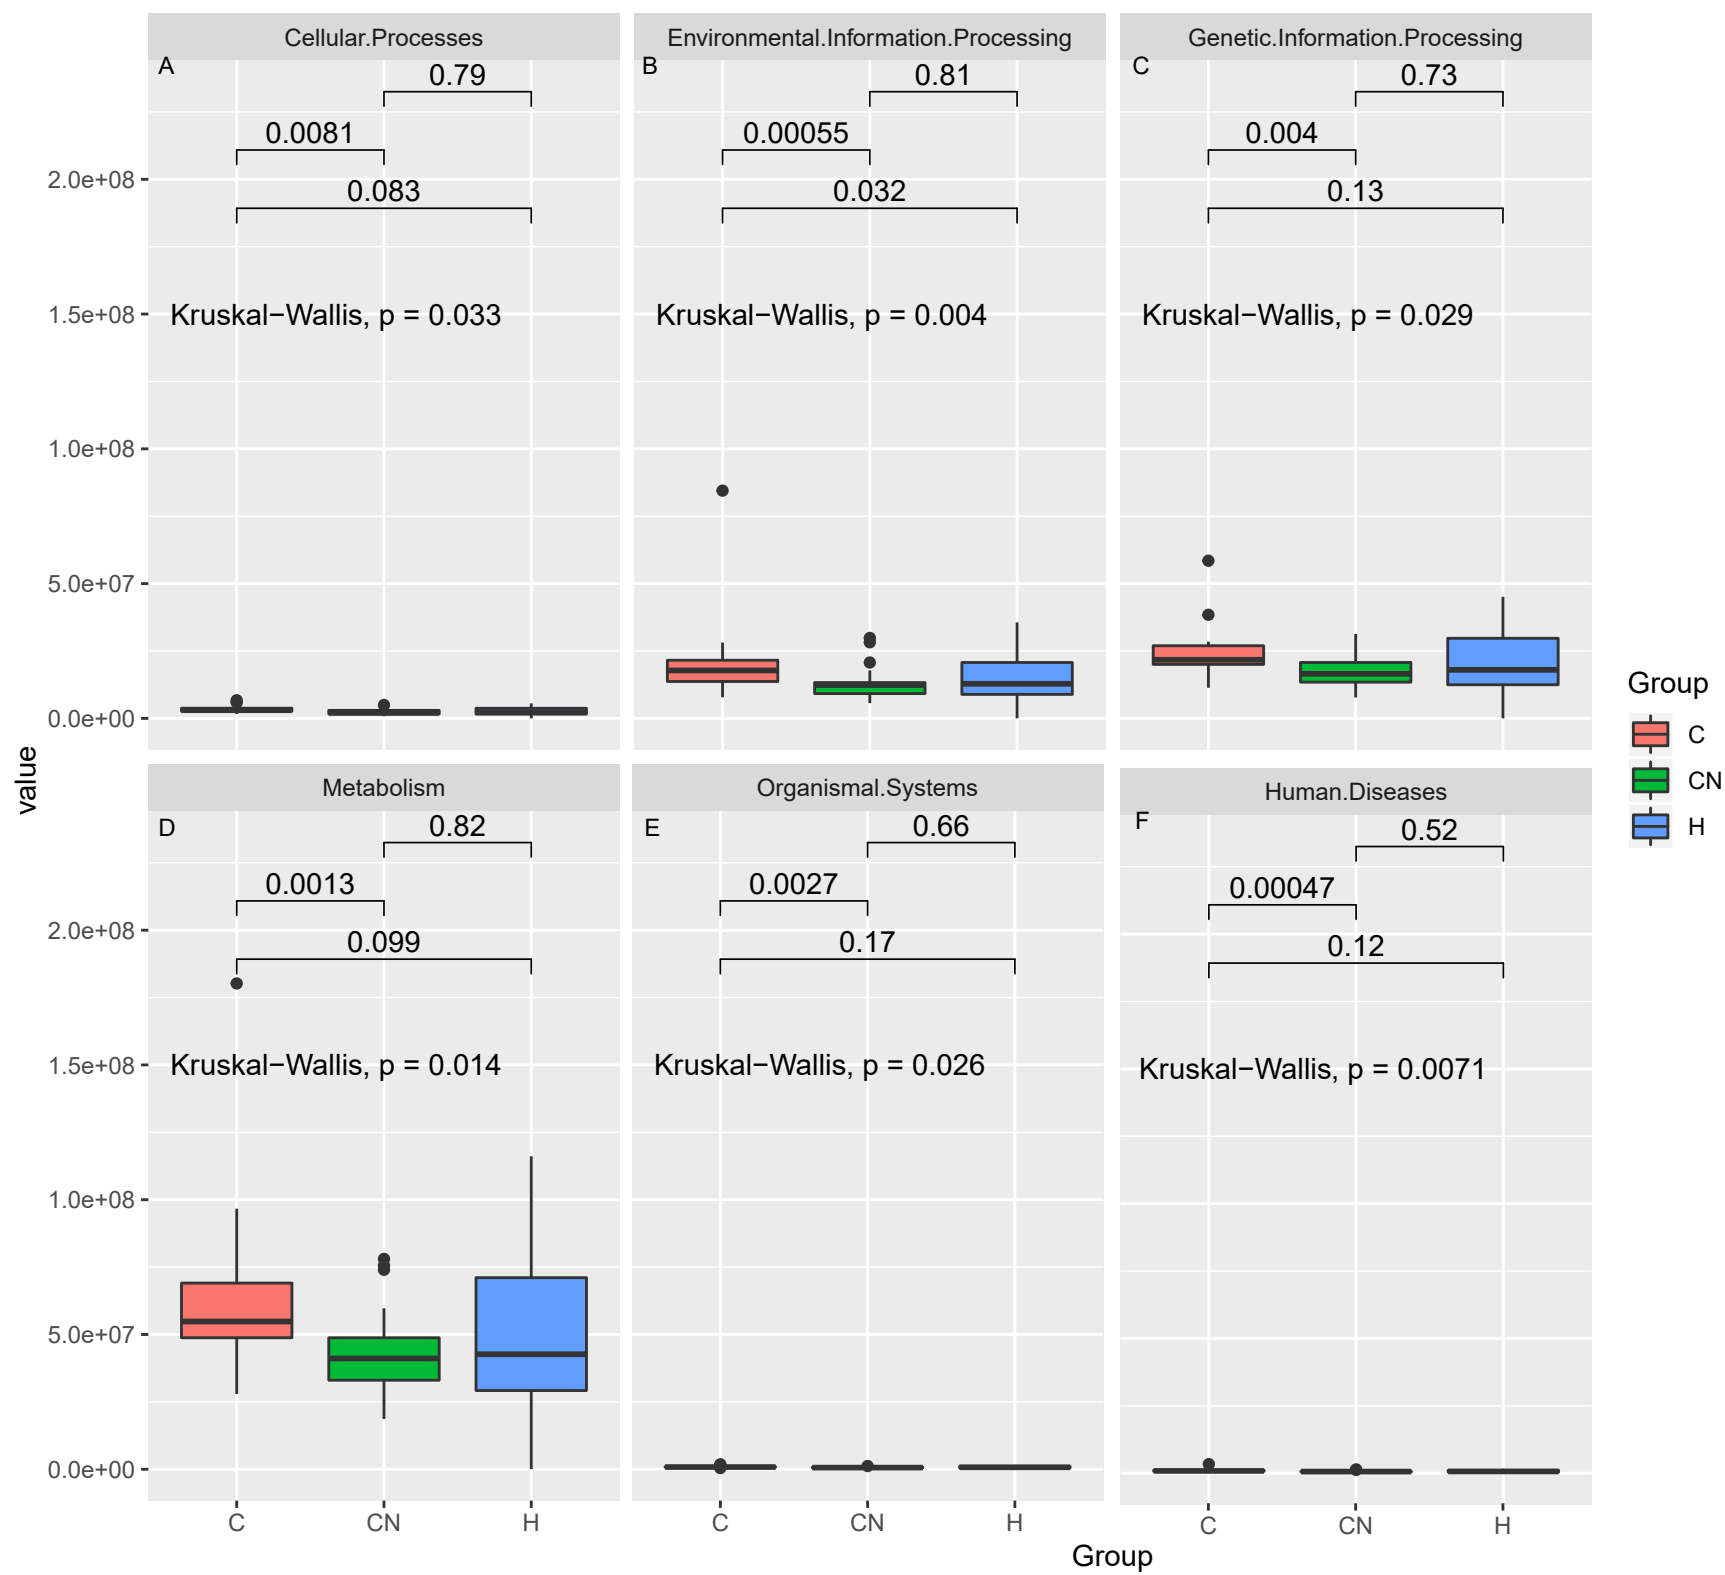

Supplement: 12864_2019_6251_MOESM1_ESM.pdf [file 12864_2019_6251_MOESM1_ESM.pdf]
